# Supplementary material
Source: HighWire-hosted journal article supplement (https://thorax.bmj.com/content/76/3/256)
Supplement: inline-supplementary-material-1 [file inline-supplementary-material-1.pdf]

**eTable 1: Comparison of Alpha Diversity p-trend results from conditional and unconditional logistic regression models, among lung cancer cases and controls, in two prospective cohorts of never-smokers.**

| Alpha diversity index metric | All 113 case-control pairs      |                                    | Excluding 3 pairs unsuccessfully matched on Antibiotic Use |                                    |
|------------------------------|---------------------------------|------------------------------------|------------------------------------------------------------|------------------------------------|
|                              | Conditional Logistic Regression | Unconditional Logistic Regression¥ | Conditional Logistic Regression                            | Unconditional Logistic Regression¥ |
| Shannon                      | 0.07                            | 0.04                               | 0.08                                                       | 0.04                               |
| Shannon*                     | 0.02                            | 0.02                               | 0.03                                                       | 0.02                               |
| Simpson                      | 0.04                            | 0.03                               | 0.05                                                       | 0.03                               |
| Simpson*                     | 0.03                            | 0.03                               | 0.04                                                       | 0.03                               |
| Observed species             | 0.96                            | 0.64                               | 0.97                                                       | 0.55                               |
| Observed species*            | 0.07                            | 0.05                               | 0.08                                                       | 0.05                               |

¥adjusted for matching factors (sex, age, sample collection time, menopause status (for women), and antibiotic use); \*adjusted for sequencing reads per sample.

**eTable 2: Alpha Diversity between lung cancer cases and controls, in two prospective cohorts of never-smokers<sup>†</sup>.**

| $\alpha$ -diversity metric                                                                                                                                                            | Medium vs Low Diversity |       |       |      | High vs Low Diversity |       |       |      | P <sub>trend</sub> |
|---------------------------------------------------------------------------------------------------------------------------------------------------------------------------------------|-------------------------|-------|-------|------|-----------------------|-------|-------|------|--------------------|
|                                                                                                                                                                                       | Odds Ratio              | 95%CI |       | P    | Odds Ratio            | 95%CI |       | P    |                    |
|                                                                                                                                                                                       |                         | Lower | Upper |      |                       | Lower | Upper |      |                    |
| <b>All subjects (114 controls vs 113 cases)</b>                                                                                                                                       |                         |       |       |      |                       |       |       |      |                    |
| Shannon                                                                                                                                                                               | 0.62                    | 0.32  | 1.21  | 0.16 | 0.73                  | 0.37  | 1.46  | 0.38 | 0.05               |
| Simpson                                                                                                                                                                               | 0.55                    | 0.28  | 1.07  | 0.08 | 0.74                  | 0.38  | 1.44  | 0.37 | 0.04               |
| Observed Species                                                                                                                                                                      | 0.81                    | 0.41  | 1.60  | 0.55 | 1.06                  | 0.55  | 2.08  | 0.85 | 0.64               |
| <b>Only subjects with no antibiotic use in 7 days prior to sample collection (103 controls vs 99 cases)<sup>†</sup></b>                                                               |                         |       |       |      |                       |       |       |      |                    |
| Shannon                                                                                                                                                                               | 0.59                    | 0.29  | 1.20  | 0.15 | 0.73                  | 0.36  | 1.49  | 0.39 | 0.07               |
| Simpson                                                                                                                                                                               | 0.47                    | 0.23  | 0.96  | 0.04 | 0.71                  | 0.35  | 1.42  | 0.33 | 0.04               |
| Observed Species                                                                                                                                                                      | 0.86                    | 0.42  | 1.77  | 0.69 | 1.22                  | 0.60  | 2.46  | 0.58 | 0.96               |
| <b>Only subjects with no antibiotic use in 7 days prior to sample collection, and sample collected <math>\geq 2</math> years before cancer (103 controls vs 86 cases)<sup>†</sup></b> |                         |       |       |      |                       |       |       |      |                    |
| Shannon                                                                                                                                                                               | 0.61                    | 0.29  | 1.28  | 0.19 | 0.73                  | 0.34  | 1.57  | 0.43 | 0.09               |
| Simpson                                                                                                                                                                               | 0.47                    | 0.22  | 1.02  | 0.05 | 0.72                  | 0.34  | 1.52  | 0.39 | 0.06               |
| Observed Species                                                                                                                                                                      | 0.81                    | 0.38  | 1.73  | 0.59 | 1.11                  | 0.53  | 2.33  | 0.79 | 0.84               |

<sup>†</sup>Adjusted for sex, age, sample collection time, menopause status (among women), education, and antibiotic use (when appropriate).

**eTable 3: Alpha Diversity, stratified by sex/cohort, between lung cancer cases and controls, in two prospective cohorts of never-smokers†.**

| α-diversity metric†                                                              | Men / Shanghai Men's Health Study |                  |      |      |                       |       |      |      |                    | Women / Shanghai Women's Health Study |        |      |      |                       |        |      |      |                    |
|----------------------------------------------------------------------------------|-----------------------------------|------------------|------|------|-----------------------|-------|------|------|--------------------|---------------------------------------|--------|------|------|-----------------------|--------|------|------|--------------------|
|                                                                                  | Medium vs Low Diversity           |                  |      |      | High vs Low Diversity |       |      |      |                    | Medium vs Low Diversity               |        |      |      | High vs Low Diversity |        |      |      |                    |
|                                                                                  | OR <sup>1</sup>                   | 95%CI            |      | P    | OR                    | 95%CI |      | P    | P <sub>trend</sub> | OR                                    | 95% CI |      | P    | OR                    | 95% CI |      | P    | P <sub>trend</sub> |
| LCI <sup>2</sup>                                                                 |                                   | UCI <sup>3</sup> | LCI  |      |                       | UCI   | LCI  |      |                    |                                       | UCI    | LCI  |      |                       | UCI    |      |      |                    |
| <b>All subjects</b>                                                              |                                   |                  |      |      |                       |       |      |      |                    |                                       |        |      |      |                       |        |      |      |                    |
| <b>24 controls vs 23 cases</b>                                                   |                                   |                  |      |      |                       |       |      |      |                    | <b>90 controls vs 90 cases</b>        |        |      |      |                       |        |      |      |                    |
| Shannon                                                                          | 0.41                              | 0.08             | 1.99 | 0.27 | 0.31                  | 0.04  | 2.67 | 0.29 | 0.23               | 0.60                                  | 0.27   | 1.30 | 0.19 | 0.80                  | 0.38   | 1.71 | 0.57 | 0.10               |
| Simpson                                                                          | 0.48                              | 0.09             | 2.44 | 0.38 | 1.23                  | 0.23  | 6.63 | 0.81 | 0.23               | 0.48                                  | 0.22   | 1.04 | 0.06 | 0.65                  | 0.31   | 1.38 | 0.26 | 0.06               |
| Observed species                                                                 | 1.20                              | 0.28             | 5.10 | 0.81 | 1.08                  | 0.15  | 7.88 | 0.94 | 0.55               | 0.79                                  | 0.36   | 1.75 | 0.57 | 1.14                  | 0.55   | 2.39 | 0.72 | 0.98               |
| <b>Only subjects with no antibiotic use in 7 days prior to sample collection</b> |                                   |                  |      |      |                       |       |      |      |                    |                                       |        |      |      |                       |        |      |      |                    |
| <b>24 controls vs 20 cases</b>                                                   |                                   |                  |      |      |                       |       |      |      |                    | <b>79 controls vs 79 cases</b>        |        |      |      |                       |        |      |      |                    |
| Shannon                                                                          | 0.41                              | 0.08             | 1.99 | 0.27 | 0.31                  | 0.04  | 2.67 | 0.29 | 0.23               | 0.58                                  | 0.25   | 1.32 | 0.19 | 0.82                  | 0.37   | 1.81 | 0.62 | 0.15               |
| Simpson                                                                          | 0.48                              | 0.09             | 2.44 | 0.38 | 1.23                  | 0.23  | 6.63 | 0.81 | 0.23               | 0.42                                  | 0.18   | 0.97 | 0.04 | 0.63                  | 0.29   | 1.38 | 0.25 | 0.07               |
| Observed species                                                                 | 1.20                              | 0.28             | 5.10 | 0.81 | 1.08                  | 0.15  | 7.88 | 0.94 | 0.55               | 0.83                                  | 0.35   | 1.95 | 0.67 | 1.33                  | 0.61   | 2.91 | 0.48 | 0.65               |

†Adjusted for age, sample collection time, menopause status (for women), education, and antibiotic use (excluding adjustment for antibiotic use in the stratified analysis); <sup>1</sup>Odds Ratio, <sup>2</sup>Lower bound of 95% confidence interval (CI); <sup>3</sup>Upper bound of 95% confidence interval (CI).

**eTable 4: Beta Diversity<sup>1</sup> between lung cancer cases and controls, in two prospective cohorts of never-smokers †.**

| Model                                    | P Value |       |       |       |       |       |       |       |       |        |        |
|------------------------------------------|---------|-------|-------|-------|-------|-------|-------|-------|-------|--------|--------|
|                                          | PCoA1   | PCoA2 | PCoA3 | PCoA4 | PCoA5 | PCoA6 | PCoA7 | PCoA8 | PCoA9 | PCoA10 | MiRKAT |
| All (114 controls vs 113 cases)          | 0.53    | 0.06  | 0.45  | 0.62  | 0.93  | 0.19  | 0.41  | 0.44  | 0.07  | 0.98   | 0.30   |
| Male (24 controls vs 23 cases)           | 0.81    | 0.13  | 0.27  | 0.26  | 0.63  | 0.68  | 0.89  | 0.68  | 0.66  | 0.30   | 0.61   |
| Female (90 controls vs 90 cases)         | 0.52    | 0.18  | 0.13  | 0.38  | 0.97  | 0.09  | 0.20  | 0.36  | 0.08  | 0.52   | 0.22   |
| Age ≤ 61 (59 controls vs 59 cases)       | 0.89    | 0.30  | 0.83  | 0.78  | 0.49  | 0.98  | 0.78  | 0.62  | 0.02  | 0.99   | 0.88   |
| Age > 61 (55 controls vs 54 cases)       | 0.23    | 0.16  | 0.82  | 0.89  | 0.88  | 0.07  | 0.27  | 0.64  | 0.77  | 1.00   | 0.35   |
| No Antibiotic (103 controls vs 99 cases) | 0.64    | 0.03  | 0.46  | 0.68  | 0.71  | 0.17  | 0.55  | 0.58  | 0.07  | 0.85   | 0.19   |

<sup>1</sup> Bray Curtis distance matrix

† MiRKAT tests the association between each covariate and each beta diversity, adjusted for sex, age, sample collection time, menopause status (for women), education, and antibiotic use (menopause, sex, and antibiotic use excluded in stratified analysis if not applicable). The percentage of variance explained by each PCoA: PCoA1 (13.7 %), PCoA2 (11.6 %), PCoA3 (6.7 %), PCoA4 (5.8 %), PCoA5 (5.0 %), PCoA6 (3.4 %), PCoA7 (3.1 %), PCoA8 (2.9 %), PCoA9 (2.5 %), and PCoA10 (2.3 %).

**Table 5: Abundance of taxa associated with risk of lung cancer<sup>†</sup> in two prospective cohorts of never-smokers, stratified by antibiotic use.**

| Taxa <sup>‡</sup>                                                                                               | Medium vs Low Abundance |                  |                  |      | High vs Low Abundance |       |      |       | P <sub>trend</sub> | Medium vs Low Abundance                                                          |        |      |      | High vs Low Abundance |      |      |                    |       |
|-----------------------------------------------------------------------------------------------------------------|-------------------------|------------------|------------------|------|-----------------------|-------|------|-------|--------------------|----------------------------------------------------------------------------------|--------|------|------|-----------------------|------|------|--------------------|-------|
|                                                                                                                 | OR <sup>1</sup>         | 95%CI            |                  | P    | OR                    | 95%CI |      | P     |                    | OR                                                                               | 95% CI |      | OR   | 95% CI                |      | P    | P <sub>trend</sub> |       |
|                                                                                                                 |                         | LCI <sup>2</sup> | UCI <sup>3</sup> |      |                       | LCI   | UCI  |       |                    |                                                                                  | LCI    | UCI  |      | LCI                   | UCI  |      |                    |       |
| <b>All subjects</b>                                                                                             |                         |                  |                  |      |                       |       |      |       |                    | <b>Only subjects with no antibiotic use in 7 days prior to sample collection</b> |        |      |      |                       |      |      |                    |       |
| <b>114 controls vs 113 cases</b>                                                                                |                         |                  |                  |      |                       |       |      |       |                    | <b>103 controls vs 99 cases</b>                                                  |        |      |      |                       |      |      |                    |       |
| <i>Spirochaetes</i> (p),<br><i>Spirochaetia</i> (c)                                                             | 0.61                    | 0.32             | 1.18             | 0.14 | 0.42                  | 0.21  | 0.85 | 0.02  | 0.01               | 0.68                                                                             | 0.34   | 1.37 | 0.28 | 0.40                  | 0.19 | 0.85 | 0.02               | 0.02  |
| <i>Bacteroidetes</i> (p),<br><i>Bacteroidetes</i> (c)                                                           | 0.66                    | 0.35             | 1.25             | 0.21 | 0.31                  | 0.15  | 0.64 | 0.002 | 0.002              | 0.74                                                                             | 0.38   | 1.45 | 0.38 | 0.25                  | 0.11 | 0.57 | <0.01              | <0.01 |
| <i>Bacteroidetes</i> (p),<br><i>Bacteroidetes</i> (c),<br><i>Bacteroidetes</i> (o)                              | 0.66                    | 0.35             | 1.25             | 0.21 | 0.31                  | 0.15  | 0.64 | 0.002 | 0.002              | 0.74                                                                             | 0.38   | 1.45 | 0.38 | 0.25                  | 0.11 | 0.57 | <0.01              | <0.01 |
| <i>Bacteroidetes</i> (p),<br><i>Bacteroidetes</i> (c),<br><i>Bacteroidetes</i> (o),<br><i>Bacteroidetes</i> (f) | 0.66                    | 0.35             | 1.25             | 0.21 | 0.31                  | 0.15  | 0.64 | 0.002 | 0.002              | 0.74                                                                             | 0.38   | 1.45 | 0.38 | 0.25                  | 0.11 | 0.57 | <0.01              | <0.01 |
| <i>Firmicutes</i> (p),<br><i>Bacilli</i> (c)                                                                    | 1.49                    | 0.73             | 3.08             | 0.28 | 2.40                  | 1.18  | 4.87 | 0.02  | 0.01               | 2.01                                                                             | 0.94   | 4.29 | 0.07 | 2.76                  | 1.30 | 5.85 | <0.01              | <0.01 |
| <i>Firmicutes</i> (p),<br><i>Bacilli</i> (c),<br><i>Lactobacillales</i> (o)                                     | 2.15                    | 1.03             | 4.47             | 0.04 | 3.25                  | 1.58  | 6.70 | 0.001 | 0.002              | 2.60                                                                             | 1.20   | 5.62 | 0.02 | 3.61                  | 1.67 | 7.78 | <0.01              | <0.01 |

<sup>†</sup>Adjusted for age, sex, sample collection time, menopause status (for women), education, and antibiotic use (excluding adjustment for antibiotic use in the stratified analysis when not applicable);

<sup>1</sup>Odds Ratio, <sup>2</sup>Lower bound of 95% confidence interval (CI); <sup>3</sup>Upper bound of 95% confidence interval (CI).

<sup>‡</sup>Indicated by phylogenetic tree attributes (p=phylum; c=class; o=order; f=family)

**eFigure 1: QQ plots of P-values from logistic models of (A) relative abundance of 315 pathways and (B) Presence/absence of 338,333 genes with a prevalence of >0.1 associated with risk of lung cancer in two prospective cohorts of never-smokers<sup>†</sup>.**

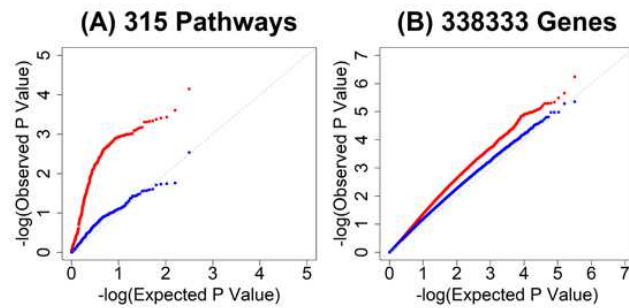

<sup>†</sup>Red points: Adjusted for sex, age, sample collection time, menopause status (for women), education, and antibiotic use; Blue points: additionally adjusted the microbiota reads rate.

**eFigure 2: Proportion of microbiota reads associated with risk of lung cancer in two prospective cohorts of never-smokers<sup>†</sup>.**

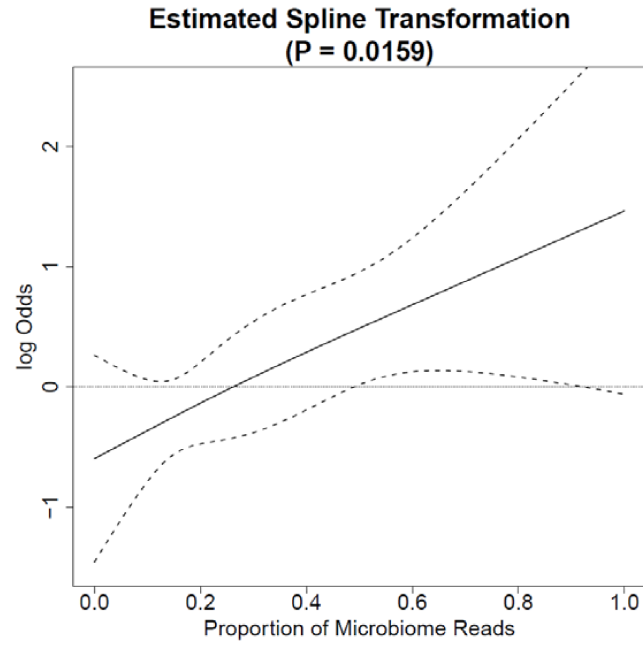

<sup>†</sup>Adjusted for sex, age, sample collection time, menopause status (for women), education, and antibiotic use
